# Supplementary material
Source: publisher site journal article supplement (https://www.kjim.org/upload/media/kjim-2018-438-suppl2.pdf)
Supplement: Supplementary file 1 [file kjim-2018-438-suppl2.pdf]

**Supplementary Table 2. Univariate analysis for intensive care unit admission in derivation and validation cohorts**

| Characteristic                                        | Derivation cohort             | Validation cohort             |
|-------------------------------------------------------|-------------------------------|-------------------------------|
|                                                       | OR (95% CI)                   | OR (95% CI)                   |
| Age, yr                                               | 1.00 (0.99–1.02)              | 1.00 (0.98–1.01)              |
| Male sex                                              | 1.10 (0.64–1.90)              | 0.84 (0.54–1.32)              |
| Underlying malignancies                               |                               |                               |
| Acute myeloid leukemia                                | 1.13 (0.67–1.93)              | 0.65 (0.41–1.04)              |
| Acute lymphoblastic leukemia                          | 1.54 (0.74–3.21)              | 1.66 (0.87–3.18)              |
| Lymphoma                                              | 0.73 (0.37–1.44)              | 0.81 (0.50–1.30)              |
| Myeloma                                               | 1.14 (0.32–4.10)              | 2.20 (0.92–5.25)              |
| Aplastic anemia                                       | 0.28 (0.30–2.52)              | 0.98 (0.20–4.90)              |
| Myelodysplasia                                        | 1.63 (0.63–4.22)              | 1.17 (0.59–2.32)              |
| Comorbidity                                           |                               |                               |
| Chronic lung disease                                  | 0.28 (0.03–2.52)              | 0.78 (0.20–2.94)              |
| Chronic heart disease                                 | 1.74 (0.95–3.18)              | 1.10 (0.63–1.91)              |
| Chronic renal disease                                 | 1.14 (0.16–8.23)              | 3.00 (0.60–15.09)             |
| Chronic liver disease                                 | 1.89 (0.60–6.00)              | 0.28 (0.08–1.03)              |
| Cerebral vascular disease                             | 1.15 (0.39–3.38)              | 0.38 (0.07–2.00)              |
| Disease status at admission                           |                               |                               |
| Newly diagnosis                                       | 0.95 (0.50–1.81)              | 2.22 (1.20–4.11) <sup>a</sup> |
| Relapsed/refractory                                   | 1.46 (0.85–2.51)              | 0.76 (0.48–1.21)              |
| Partial remission                                     | 0.37 (0.04–3.64)              | 1.27 (0.46–3.49)              |
| Complete remission                                    | 0.70 (0.31–1.58)              | 0.56 (0.28–1.12)              |
| BMT/HSCT recipient                                    | 1.89 (1.10–3.25) <sup>a</sup> | 1.49 (0.94–2.40)              |
| ECOG performance status                               | 1.12 (0.84–1.50)              | 1.07 (0.88–1.29)              |
| Major reasons for MET activation                      |                               |                               |
| Respiratory distress                                  | 1.15 (0.67–2.00)              | 1.22 (0.78–1.89)              |
| Sepsis/septic shock                                   | 1.14 (0.63–2.07)              | 0.86 (0.50–1.49)              |
| Hypovolemic shock                                     | 0.44 (0.08–2.33)              | 0.64 (0.18–2.32)              |
| Altered mental status                                 | 4.84 (1.00–23.35)             | 2.59 (0.98–6.84)              |
| Metabolic acidosis                                    | 0.32 (0.89–1.20)              | 0.58 (0.23–1.44)              |
| Laboratory at MET activation                          |                               |                               |
| Lactic acid, mmol/L                                   | 0.98 (0.91–1.05)              | 1.08 (1.00–1.18)              |
| Neutropenia <sup>b</sup>                              | 1.04 (0.61–1.77)              | 1.16 (0.67–2.00)              |
| Modified early warning score                          | 1.89 (1.57–2.28) <sup>c</sup> | 1.47 (1.30–1.66) <sup>d</sup> |
| SpO <sub>2</sub> /FiO <sub>2</sub> score <sup>e</sup> | 1.59 (1.30–1.95) <sup>c</sup> | 1.87 (1.57–2.23) <sup>d</sup> |
| qSOFA score                                           | 1.07 (0.65–1.77)              | 0.83 (0.58–1.17)              |
| SOFA score                                            | 1.12 (1.02–1.24) <sup>a</sup> | 1.35 (1.22–1.50) <sup>d</sup> |

OR, odds ratio; CI, confidence interval; BMT, bone marrow transplantation; HSCT, hematopoietic stem cell transplantation; ECOG, Eastern Cooperative Oncology Group; MET, medical emergency team; qSOFA, quick sequential organ failure assessment; SOFA, sequential organ failure assessment.

<sup>a</sup> $p < 0.05$ .

<sup>b</sup>Neutropenia, absolute neutrophil count  $< 500/\mu\text{L}$ .

<sup>c</sup> $p < 0.01$ .

<sup>d</sup> $p < 0.001$ .

<sup>e</sup>SpO<sub>2</sub>/FiO<sub>2</sub> score, 0 points for  $> 315$ , 2 points for  $\leq 315$  SpO<sub>2</sub>/FiO<sub>2</sub> ratio  $< 235$ , 3 points for  $\leq 235$ .
